# Supplementary material for: Aminobenzocoumarinylmethyl esters as photoactive precursors for the release of butyric acid
Source: Royal Society of Chemistry journal article supplement (doi:10.1039/c5nj00699f), 2015-01-01
Supplement: c5nj00699f1.pdf [file c5nj00699f1.pdf]

**SUPPORTING INFORMATION**

**Title:** Aminobenzocoumarinylmethyl esters as photoactive precursors for the release of butyric acid

**Authors:** Ana M. S. Soares, Graham Hungerford, Susana P. G. Costa, and M. Sameiro T. Gonçalves

**TABLE OF CONTENTS**

|                                                                                                                                                                                                                                             | page |
|---------------------------------------------------------------------------------------------------------------------------------------------------------------------------------------------------------------------------------------------|------|
| <b>1.</b> Absorption for compounds <b>2</b> , <b>3a,b</b> and <b>4a,b</b> , EEM and decay associated spectra for compound <b>2</b> in MeOH/HEPES (80:20) and difference between frontier orbitals for compounds <b>3a,b</b> and <b>4a,b</b> | 2    |
| <b>2.</b> <sup>1</sup> H and <sup>13</sup> C NMR spectra of compounds <b>1</b> , <b>2</b> , <b>3a,b</b> and <b>4a,b</b>                                                                                                                     | 4    |
| <b>3.</b> UV/Vis absorption and fluorescence spectra for compounds <b>1</b> , <b>2</b> , <b>3a,b</b> and <b>4a,b</b> in ethanol                                                                                                             | 10   |
| <b>4.</b> HPLC chromatograms for the photolysis of compounds <b>2</b> , <b>3a,b</b> and <b>4a,b</b>                                                                                                                                         | 11   |

1. Absorption for compounds **2**, **3a,b** and **4a,b**, EEM and decay associated spectra for compound **2** in MeOH/HEPES (80:20) and difference between frontier orbitals for compounds **3a,b** and **4a,b**

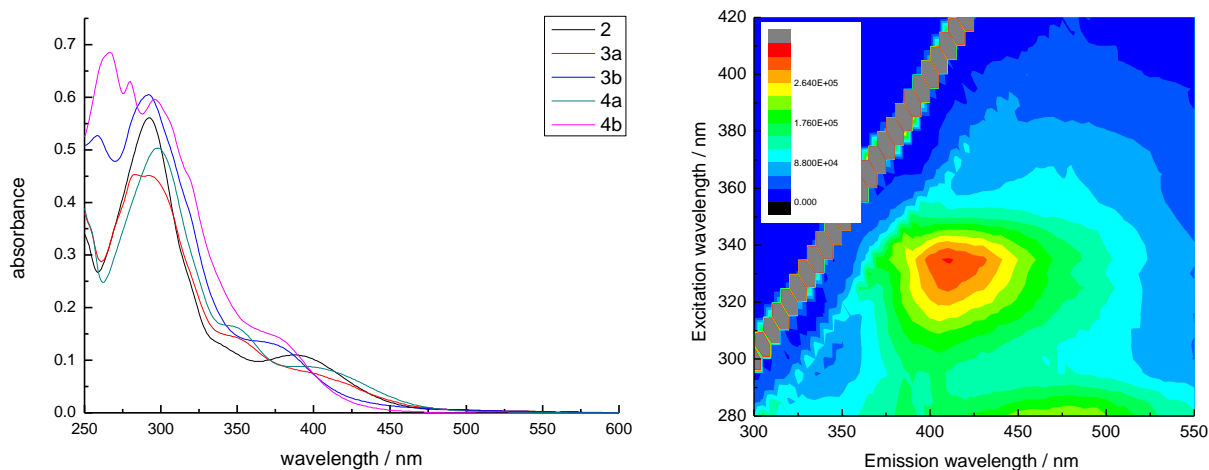

**Figure S1.** Absorption spectra (measured using a Shimadzu UV-1800) for compounds **2-4** in MeOH/HEPES (80:20) (left) and EEM for **2** in same solvent mixture (recorded using a FluoroLog 3) (right).

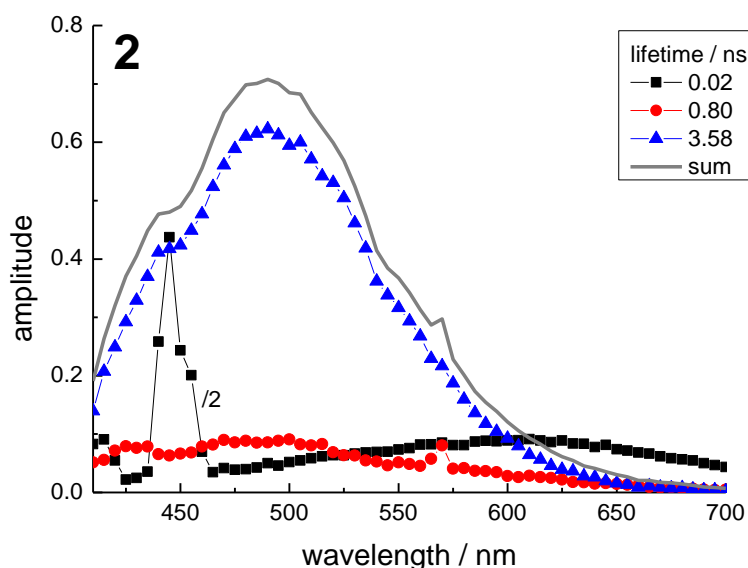

**Figure S2.** Decay associated spectra for compound **2** in MeOH/HEPES (80:20). The shorter-lifetime component (associated with Raman scattering at 445 nm) is omitted in calculation of the “sum” spectrum. Measured using a DeltaFlex fluorescence lifetime system with excitation at 392 nm.

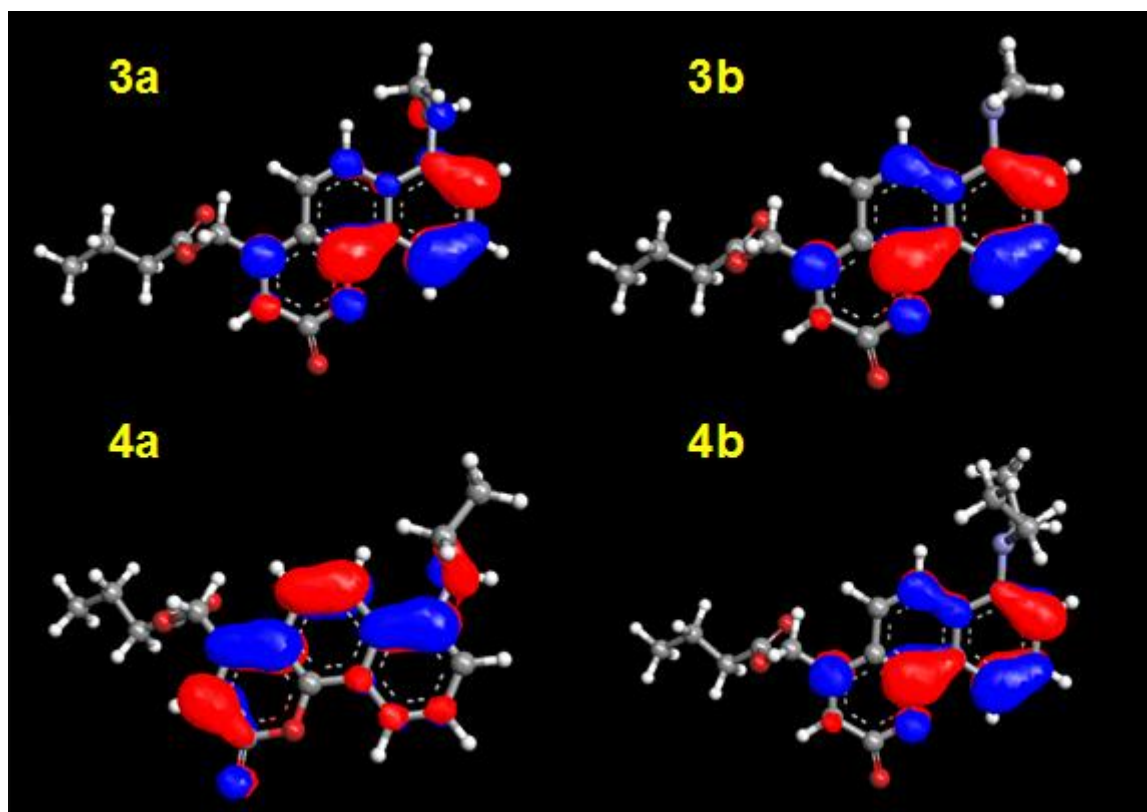

**Figure S3.** Difference between frontier orbitals (HOMO and LUMO; blue – positive, red – negative) for compounds **3a,b** and **4a,b**. Calculated using ArgusLab 4.0.1 software (Mark Thompson & Planaria Software LLC).

2.  $^1\text{H}$  and  $^{13}\text{C}$  NMR spectra of compounds **1**, **2**, **3a,b** and **4a,b**

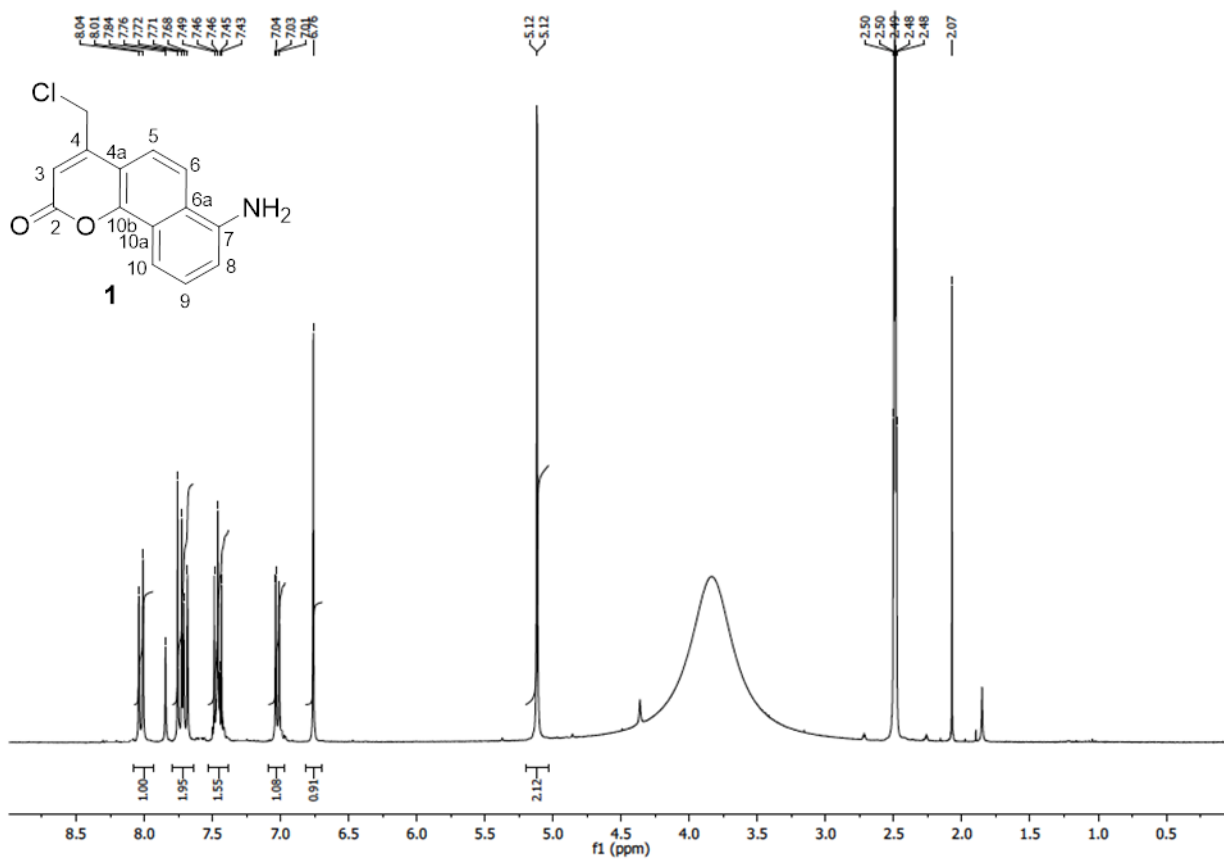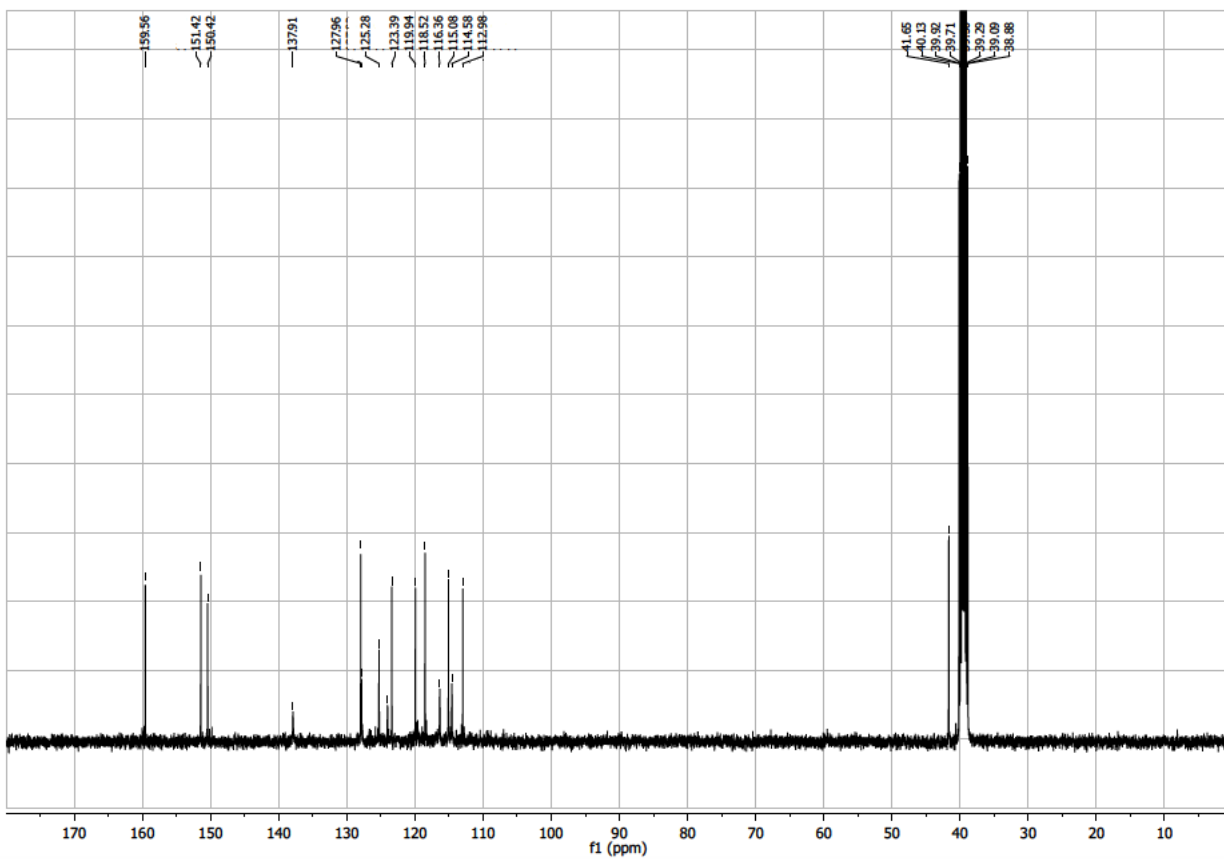

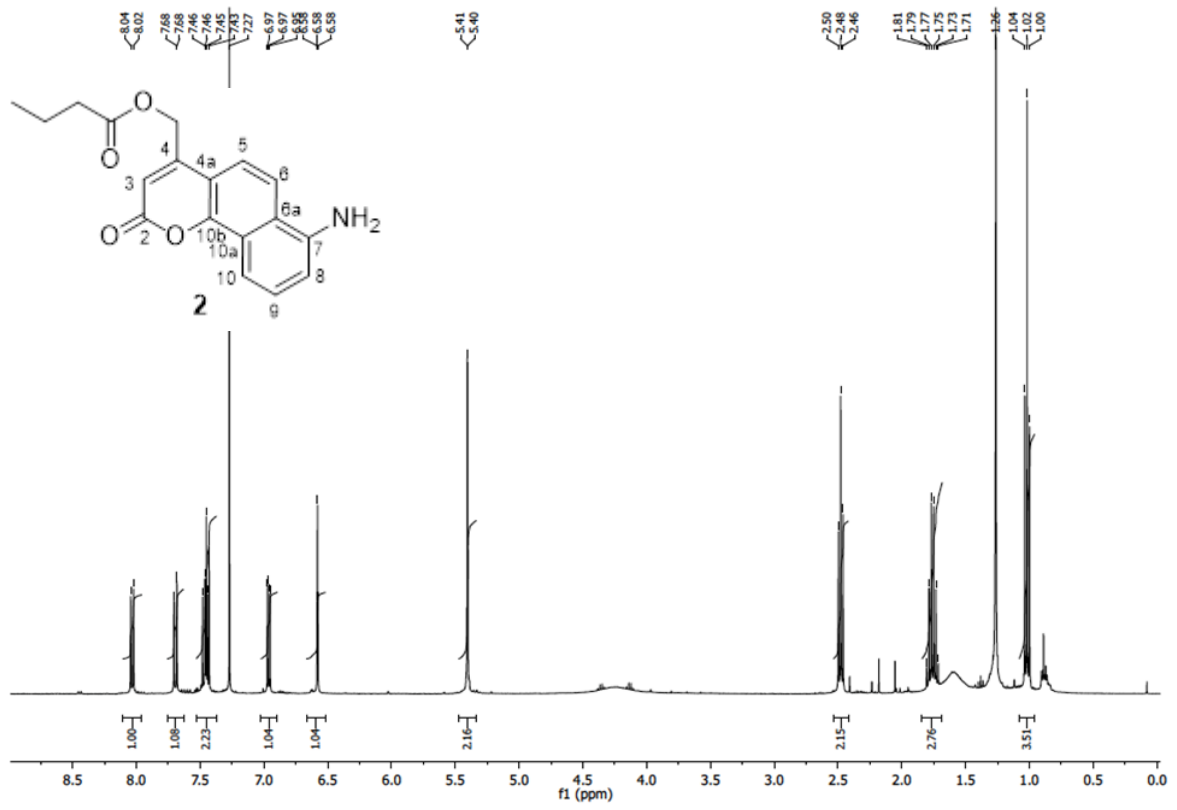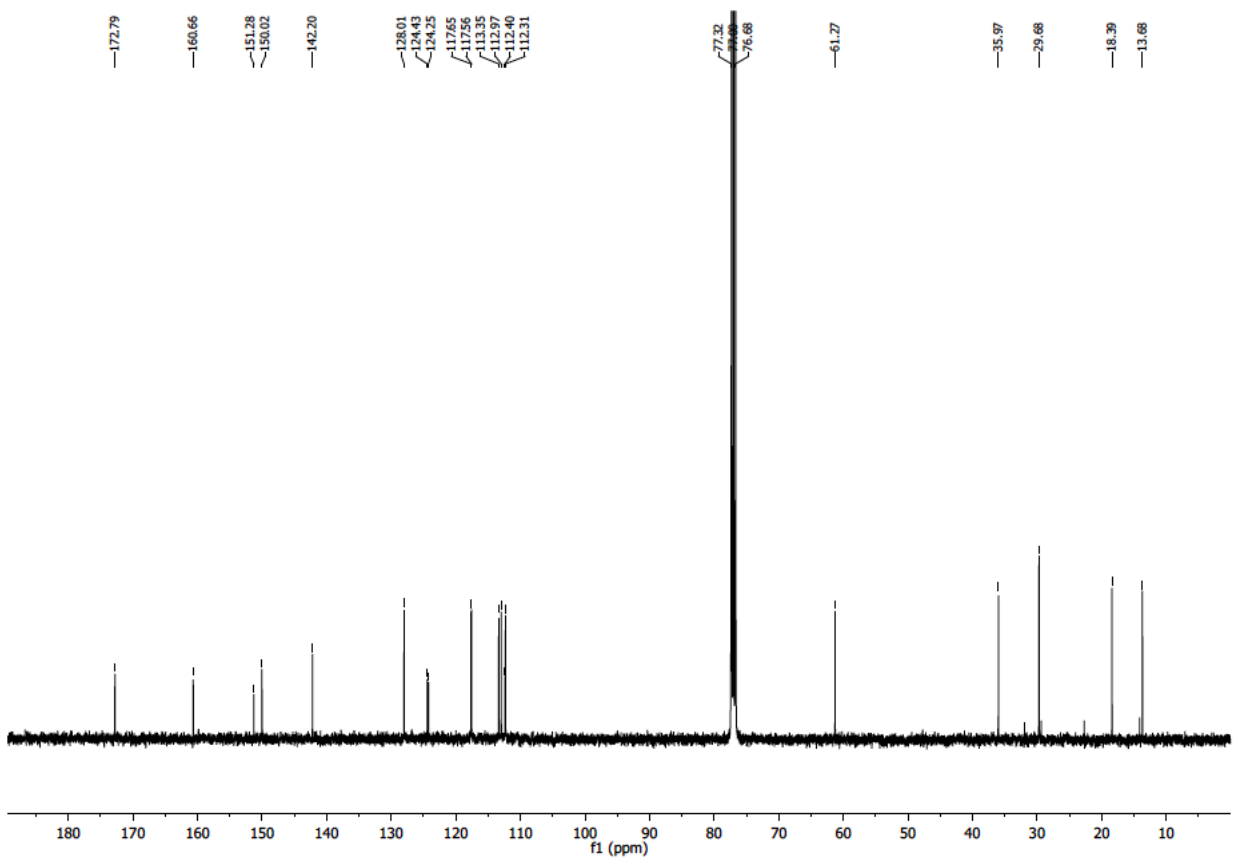

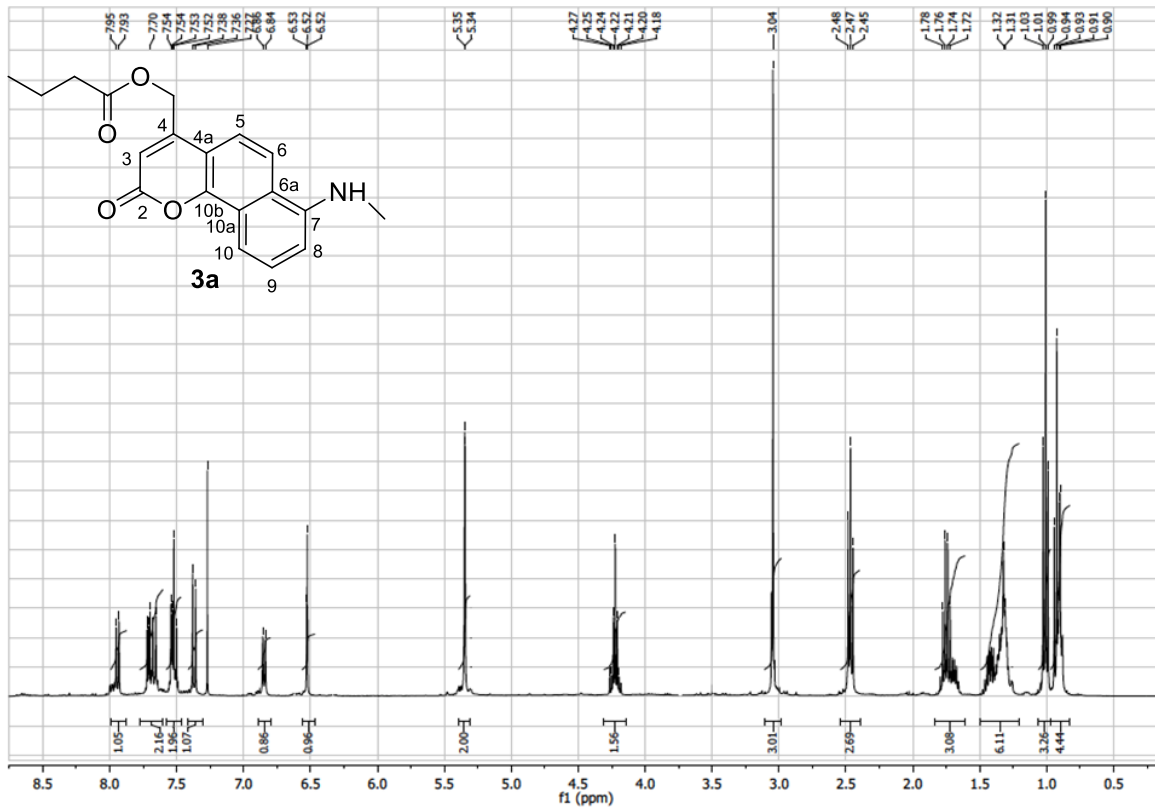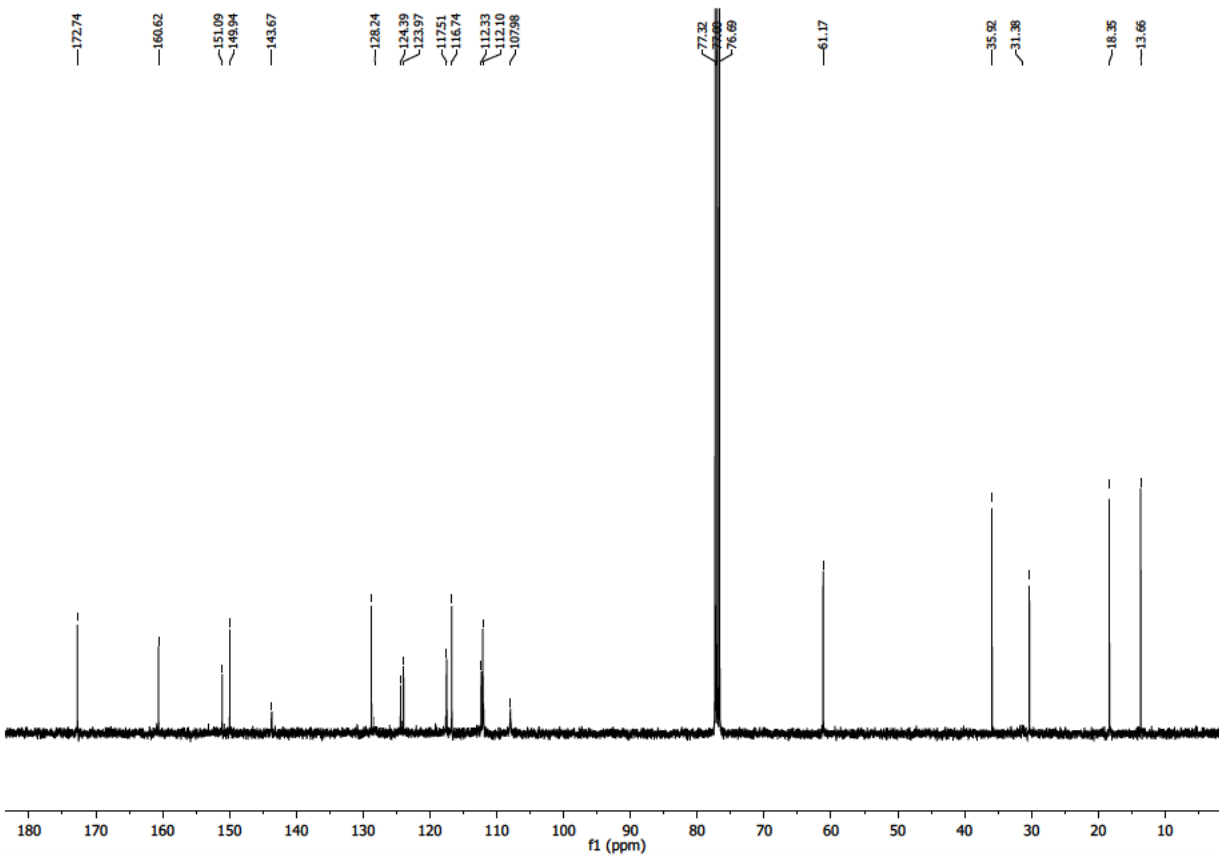

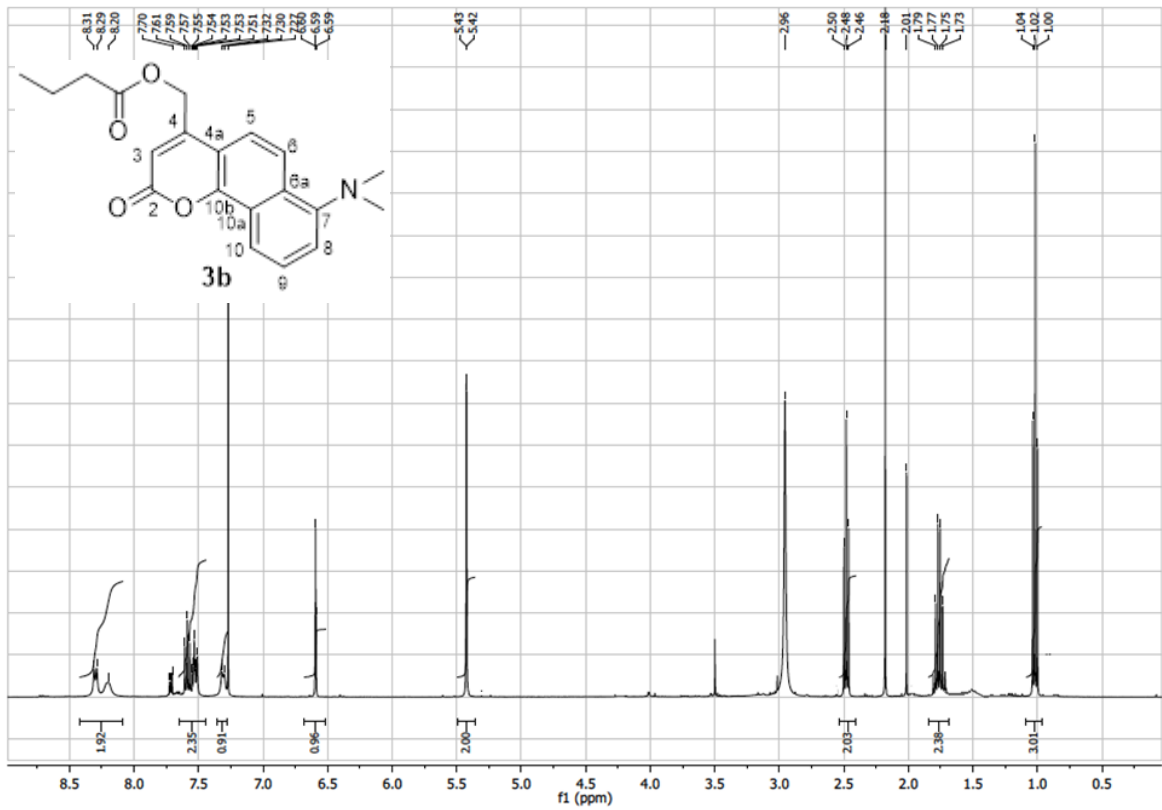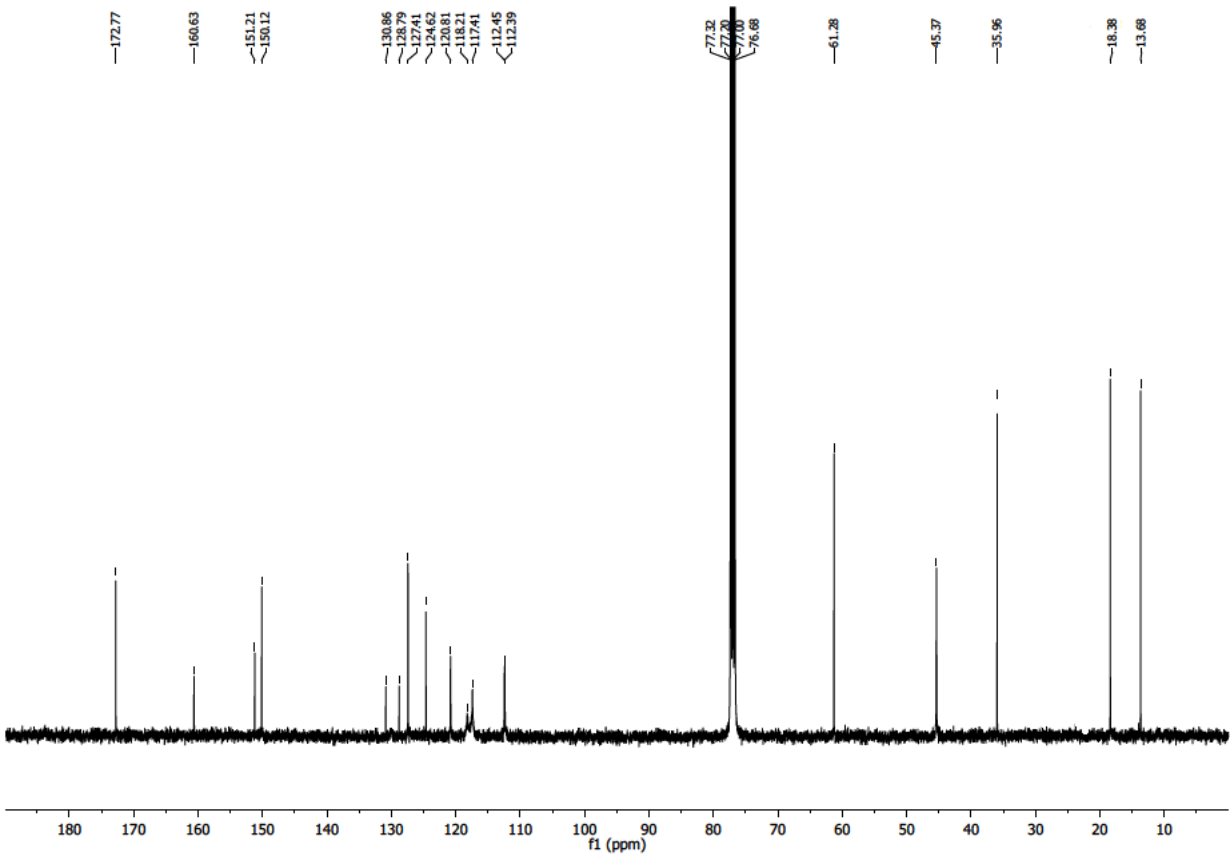

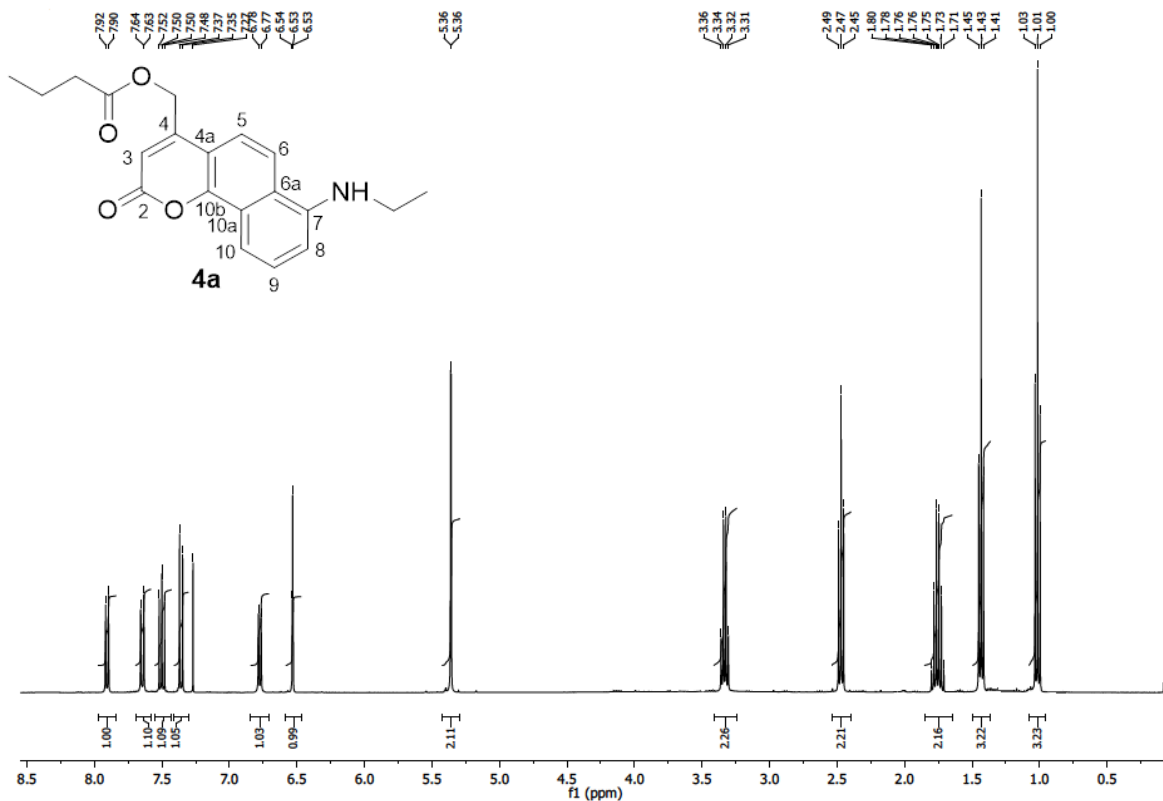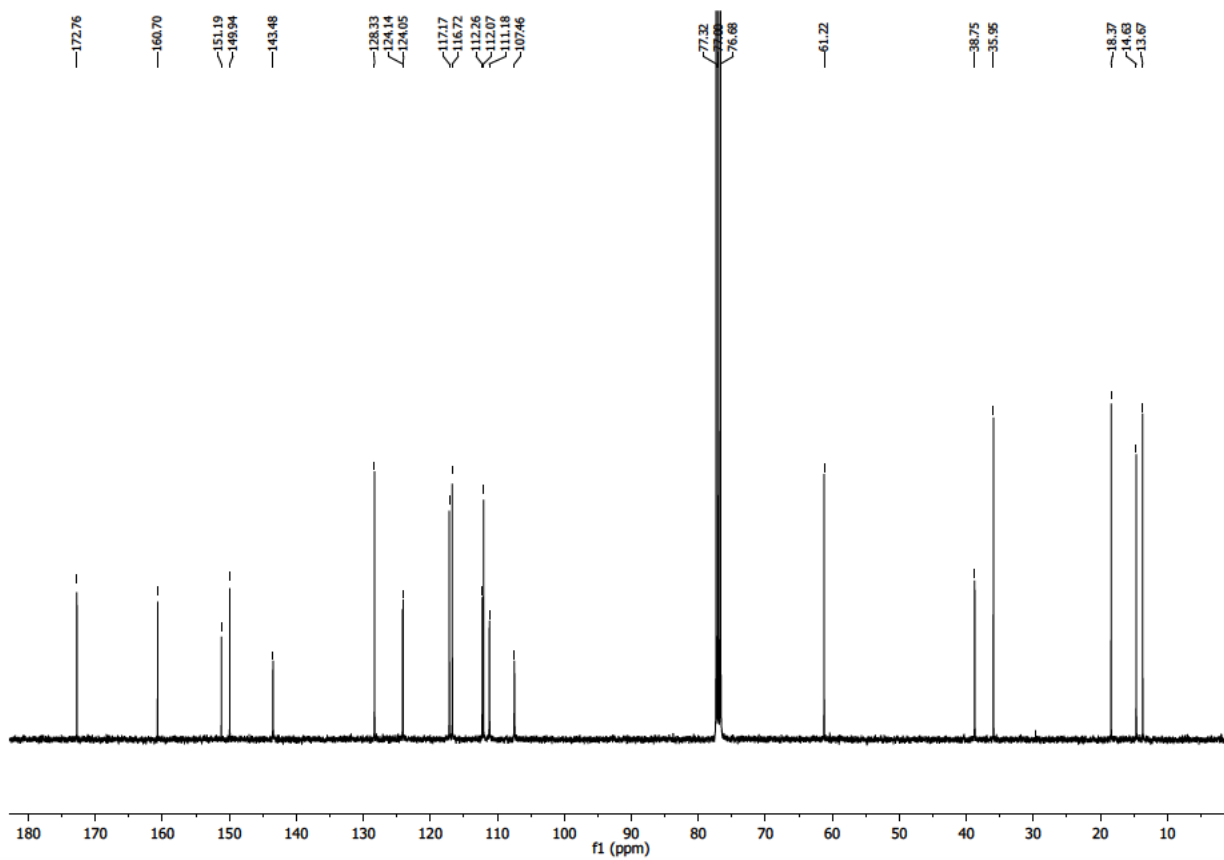



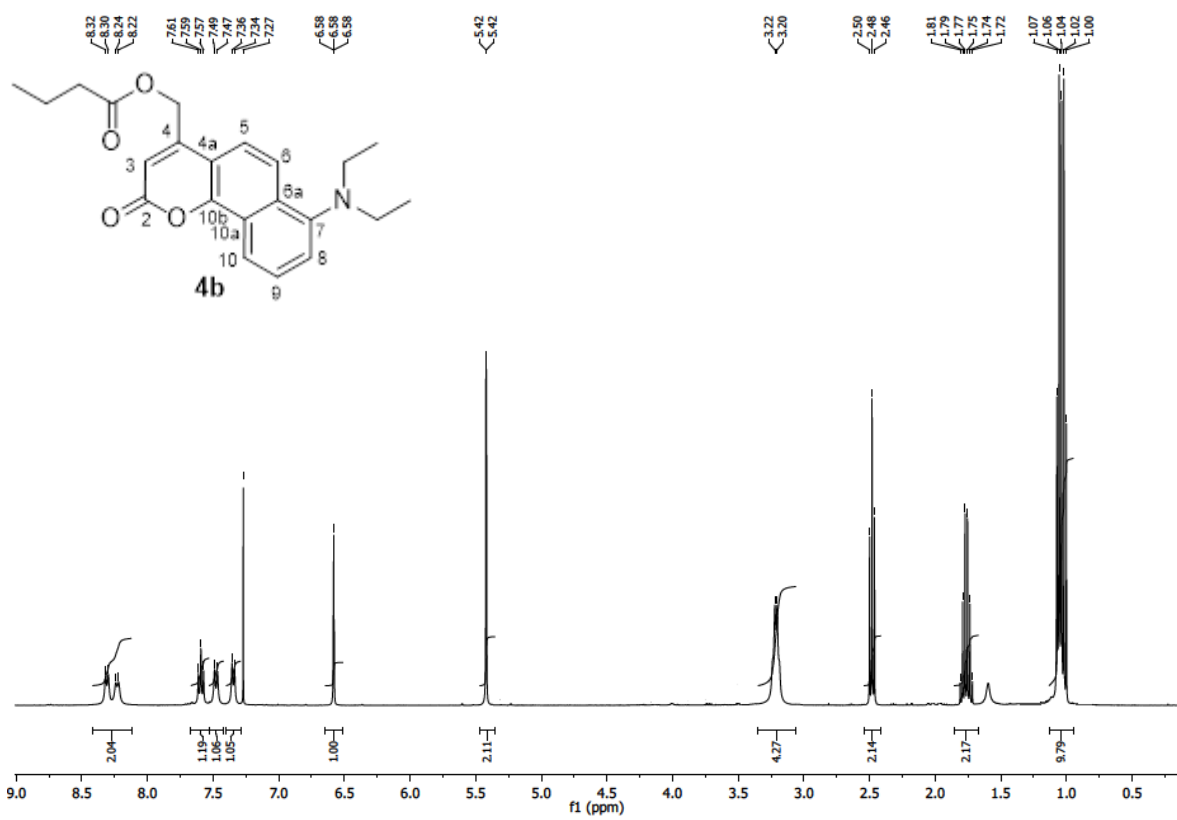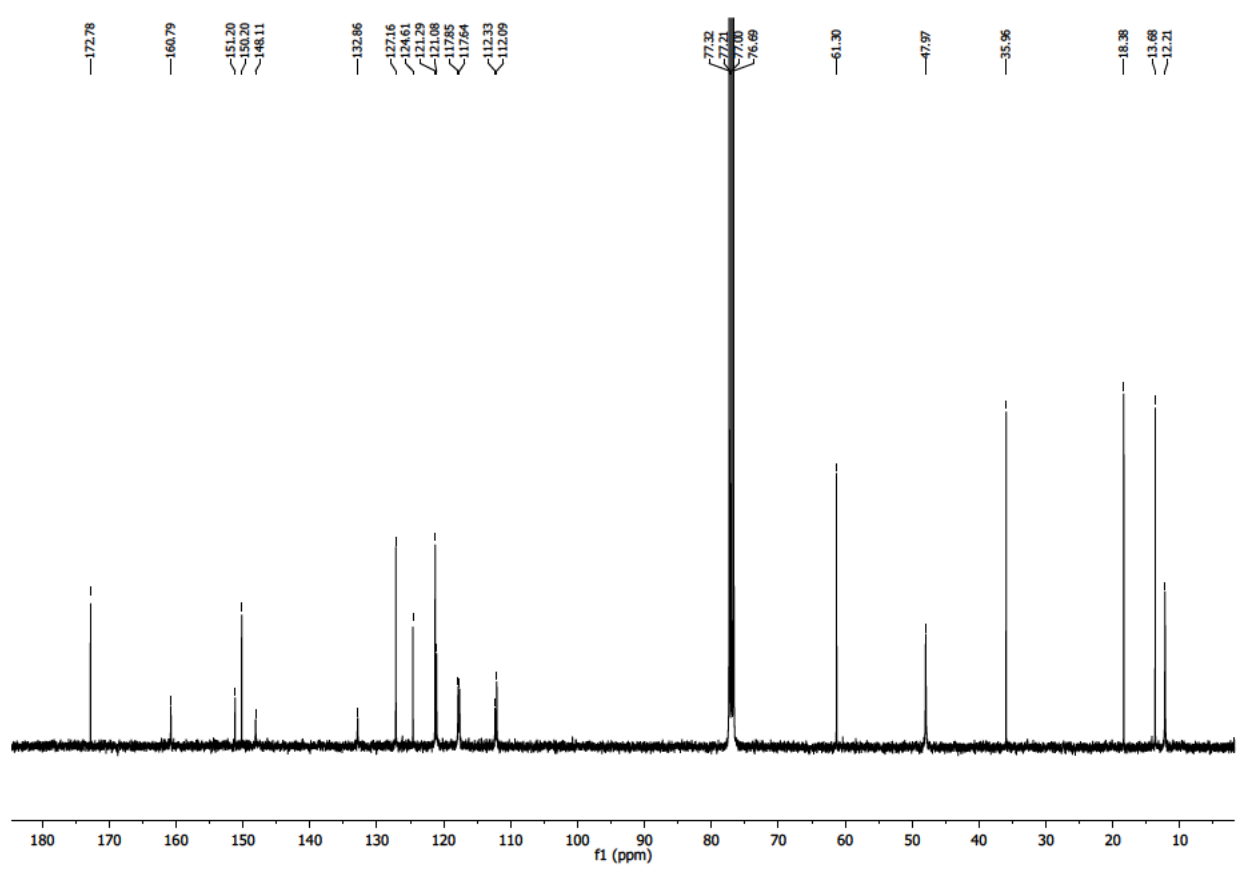

### 3. UV/Vis absorption and fluorescence spectra for compounds **1**, **2**, **3a-b** and **4a-b** in ethanol

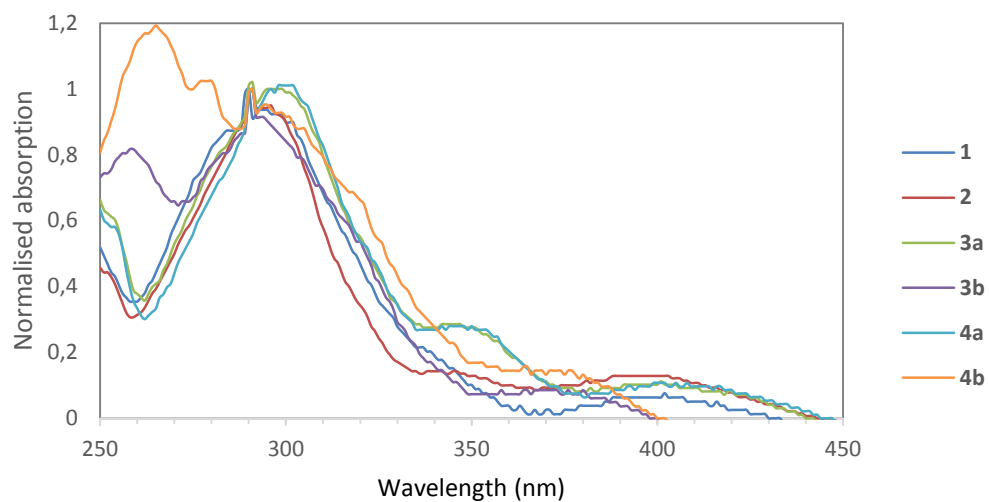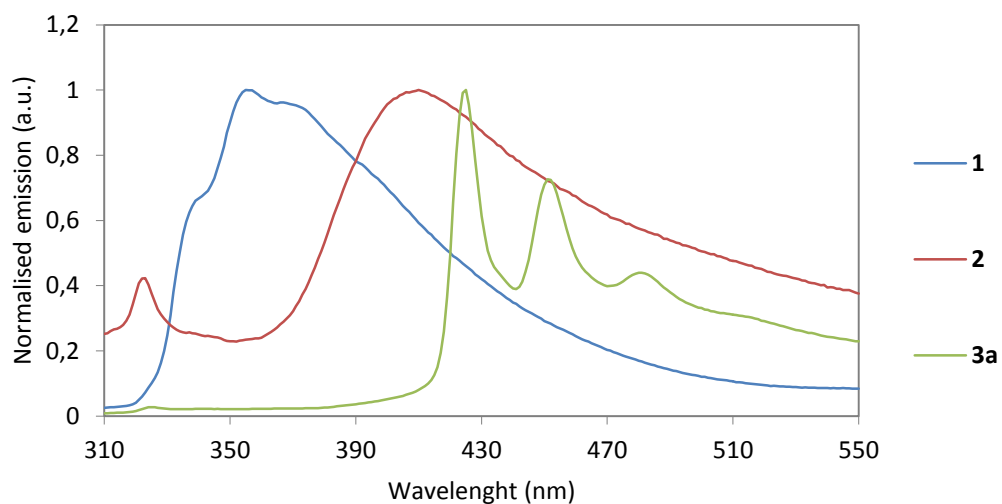

#### 4. HPLC chromatograms for the photolysis of compounds **2**, **3a,b** and **4a,b**

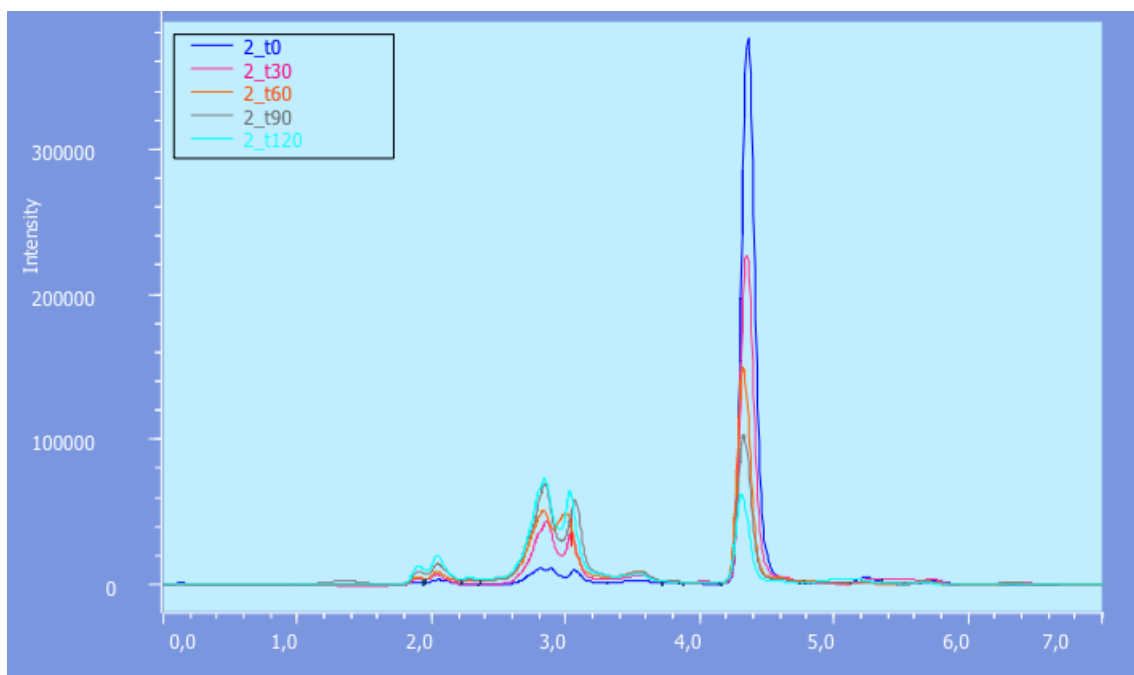

HPLC chromatogram of the photolysis of conjugate **2** (retention time 4.4 min) with eluent ACN/H<sub>2</sub>O (75:25) at a flow rate of 0.8 mL/min,  $\lambda_{\text{det}} = 293$  nm.

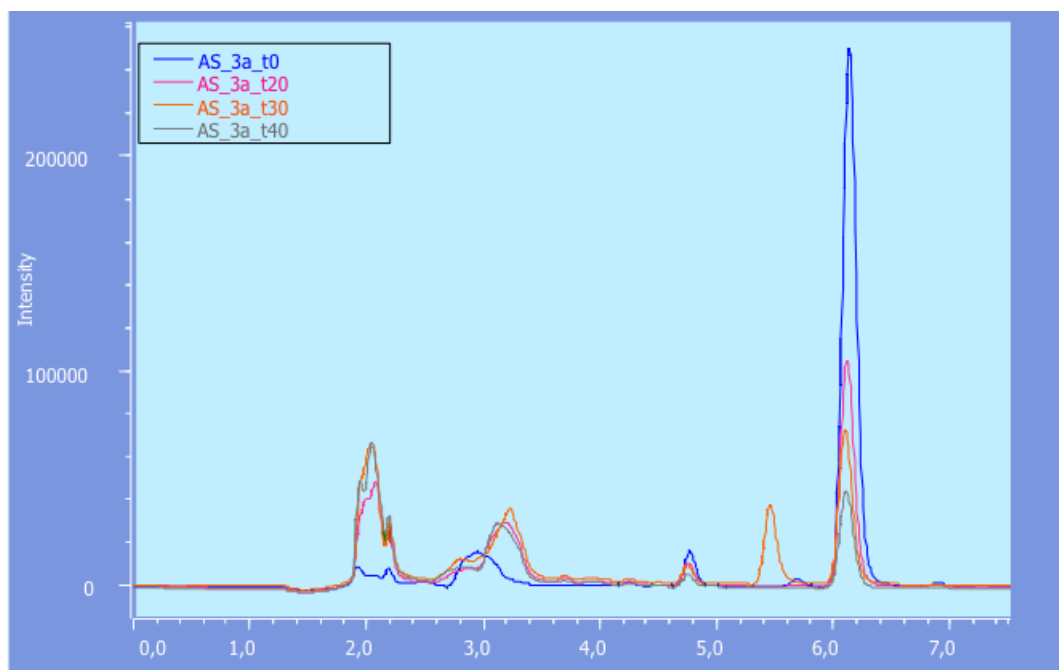

HPLC chromatogram of the photolysis of conjugate **3a** (retention time 6.3 min) with eluent ACN/H<sub>2</sub>O (75:25) at a flow rate of 0.8 mL/min,  $\lambda_{\text{det}} = 291$  nm.

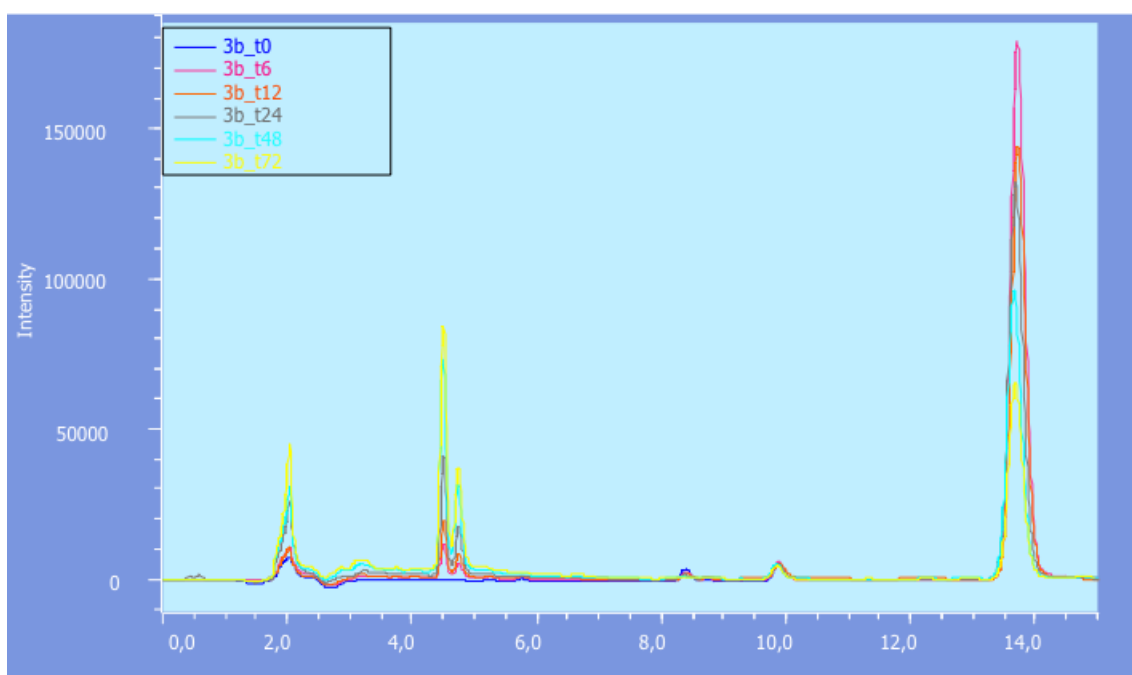

HPLC chromatogram of the photolysis of conjugate **3b** (retention time 13.7 min) with eluent ACN/H<sub>2</sub>O (75:25) at a flow rate of 0.8 mL/min,  $\lambda_{\text{det}} = 290$  nm.

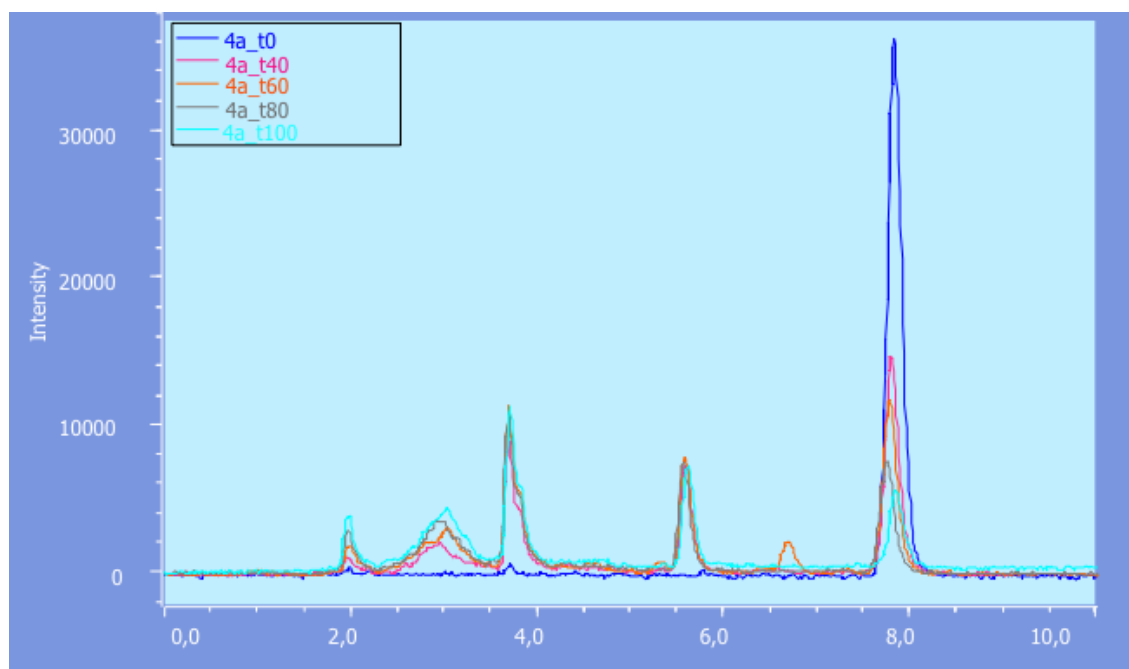

HPLC chromatogram of the photolysis of conjugate **4a** (retention time 7.9 min) with eluent ACN/H<sub>2</sub>O (75:25) at a flow rate of 0.8 mL/min,  $\lambda_{\text{det}} = 298$  nm.

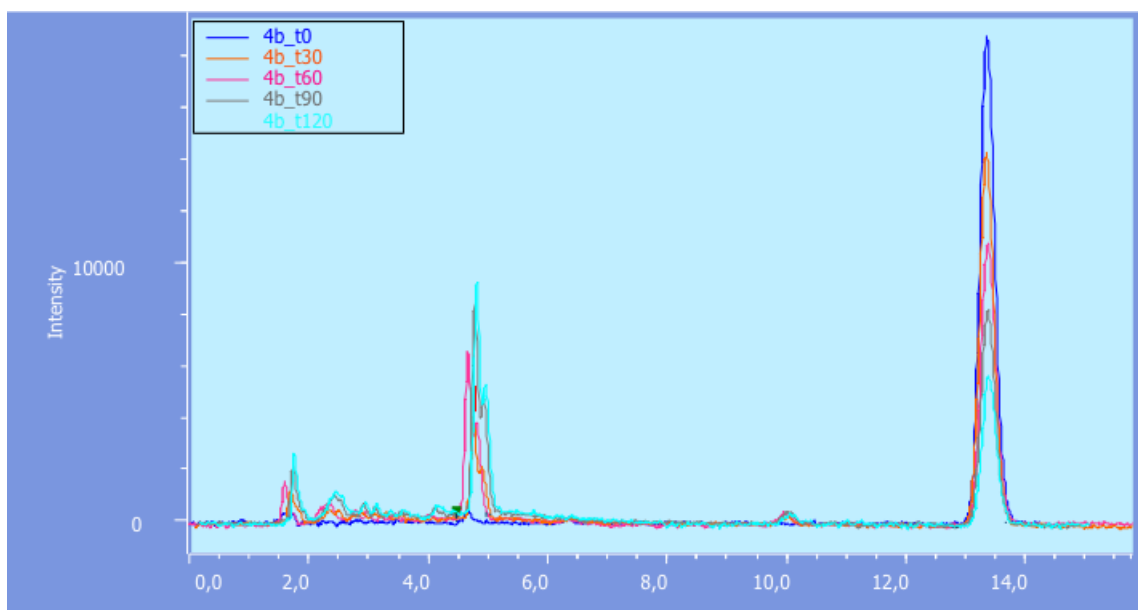

HPLC chromatogram of the photolysis of conjugate **4b** (retention time 13.4 min) with eluent ACN/H<sub>2</sub>O (75:25) at a flow rate of 1.0 mL/min,  $\lambda_{\text{det}} = 295$  nm.
